# 1 **Lane-maze for preference testing in flies**

2 Fabiola Boz Eckert<sup>1,4</sup>, Dhiozer de Brittos Valdati<sup>2</sup>, José Marino Neto<sup>2</sup>, Daniela Cristina de

3 Toni<sup>3</sup>, Cilene Lino de Oliveira <sup>1,4</sup>

4 <sup>1</sup> UFSC - Postgraduate Program in Pharmacology (Florianópolis, SC-Brazil), <sup>2</sup> UFSC -

5 Institute of Biomedical Engineering (Florianópolis, SC-Brazil), <sup>3</sup> UFSC - Department of

6 Cellular Biology, Embryology and Genetics (Florianópolis, SC-Brazil), <sup>4</sup> UFSC -

7 Department of Physiological Sciences (Florianópolis, SC-Brazil)

8 **Corresponding Author:** Cilene Lino de Oliveira, Departamento de Ciências Fisiológicas,

9 Centro de Ciências Biológicas, Universidade Federal de Santa Catarina, Campus

10 Universitário Trindade, 88049-900 – Florianópolis – SC – Brazil. **Contact:**

11 [cilene.lino@ufsc.br](mailto:cilene.lino@ufsc.br)

12

13 **Abstract**

14 *Drosophila melanogaster* is a candidate species to replace rodents in some  
15 neurobiological studies, encouraging attempts to develop behavioural tests for these flies.  
16 This study aimed to develop a behavioural test to simultaneously evaluate ethological  
17 (categorical) aspects of the motor and fluid intake activities, which may be used to assess  
18 sucrose preference in flies. For that, a lane-maze was 3D-printed to accommodate up to 14  
19 individual flies in a single trial. Each lane had a capillary filled with 5% sucrose solution  
20 attached to one of the extremities. To validate a 5-min lane-maze test, male and female flies  
21 (adults, 5-6 days of age) underwent 0, 2, 8 or 20 h of food deprivation (FD, n=9-11/group)  
22 before testing. Duration of locomotion, immobility and grooming in the lane or capillary  
23 were scored from the video-recorded trials using EthoWatcher software. Minor effects of sex  
24 or FD were observed in the behaviours of flies. Independent of sex or FD, flies spent  
25 proportionally longer on the capillary than on the lane. Flies exhibited a significantly higher  
26 preference than expected for the capillary zone when food-deprived for 2h (males) or 20 h  
27 (females). Data suggest that short lane-maze test is a feasibly high throughput assessment of  
28 sucrose preference in flies, which may be sexually dimorphic as in other species studied so  
29 far.

30 **Keywords:** behaviour; motor activity; preference; replacement; sexual differences.

31

## 32 **Introduction**

33 Models and behavioural tests in rodents have been criticised by the scientific  
34 community due to concerns about their clinical validity, application, and animal welfare,<sup>1</sup>  
35 pushing the research field to find alternatives to the use of vertebrates in research. The 3Rs  
36 principles may help the scientific community to perform better animal research.<sup>2</sup> Refinement  
37 may minimise animal suffering and improve welfare, while reduction may guide methods  
38 minimising the number of animals used per experiment. The principle of replacement can  
39 lead to methods with full or partial substitution of animals using alternative methods. Full  
40 replacement avoids using any non-human animal in research, by substituting them with  
41 human volunteers, tissues and cells, mathematical and computer models, and established cell  
42 lines. Partial replacement avoids using vertebrates in research, by substituting them with  
43 invertebrates such as nematode, social amoebae, flies, and others, which cannot experience  
44 suffering based on current scientific knowledge although they react to threats.

45 In this context, *Drosophila melanogaster* has been considered a candidate organism  
46 to replace laboratory rodents or other vertebrates in neuroscientific studies.<sup>3,4,5,6</sup> Feeding,  
47 sleep, aggression, preferences, learning, memory and responses to stress in *Drosophila* are  
48 controlled by monoamines, distinct monoamine receptors and neural circuits.<sup>5,6,7,8,9</sup> Beyond  
49 that, *D. melanogaster* has well-known anatomy, physiology, genome, proteome and natural  
50 behaviour.<sup>3,10</sup> Notably, different strains of *Drosophila* with various phenotypes may be kept  
51 and reproduced quickly in the laboratory allowing for the planning of well-powered  
52 experiments as required in neurobiological research. Nevertheless, unlike rodents, models,  
53 behavioural tests for studying psychopharmacology or neurobiology of stress in *Drosophila*

54 are still in the embryonic steps of standardisation.<sup>11,12</sup> In laboratory rodents, symptoms of  
55 stress may be assessed using several behavioural tests such as positive or negative avoidance,  
56 forced swimming, tail suspension, sucrose preference and others.<sup>13,14,15,16,17</sup>

57 Since the pioneer study reporting learned helplessness in flies,<sup>18</sup> several attempts to  
58 develop models and behavioural tests for stress response in *Drosophila* have been made.<sup>19,</sup>

59 <sup>20</sup> Flies trained to receive inescapable heat shocks failed to escape from the stressor even  
60 when the opportunity appeared, different from those trained with escapable heat shocks.<sup>18</sup>

61 Another study demonstrated that exposure to vibrations for three days reduced the walking  
62 of flies in the climbing test.<sup>5</sup> A random sequence of variable stresses (including cooling,

63 heating, sleep and food deprivation) for ten days induced high immobility in the forced  
64 swimming test, aggressiveness in social interaction test and anhedonia-like behaviour in a

65 sucrose preference test in *Drosophila*.<sup>19</sup> A protocol using a short, random and unpredictable  
66 combination of stressors (18 h-social isolation, six hour-fasting, 20 min-heat shock and five

67 min-electric shocks) induced hyperactivity and *centrophilia* (preference for staying in the  
68 centre of the arena) in an open field test, as well as less preference for sucrose in a one-minute

69 preference test in a Petri dish.<sup>20</sup> Fasting *per se* induced hyperactivity and centrophilic  
70 behaviour in flies but, in contrast to the combination of stressors, increased sucrose

71 preference<sup>20</sup>, probably, due to a nutritional deficit. Although signs of stress in *Drosophila*  
72 seemed to be stressor-dependent, different types of stimuli affected motor activity in the open

73 field test and the preference for sucrose.

74 Preference for sucrose may be assessed using tests measuring sucrose intake in  
75 *Drosophila*, such as fly Proboscis and Activity Detector (flyPAD)<sup>21</sup>, capillary feeding

76 (CAFE),<sup>22, 23</sup> proboscis's extension,<sup>24</sup> dyed abdomen,<sup>25</sup> Fly Liquid-Food Interaction Counter  
77 (FLIC),<sup>26</sup> or "Activity Recording Capillary Feeder" (ARC).<sup>27</sup> Except for ARC<sup>27</sup>, most of the  
78 abovementioned methods were developed to investigate a single experimental unit at a time  
79 (an individual fly or a group of flies). ARC<sup>27</sup> employed positional tracking allowing for the  
80 simultaneous assessment of sleeping and fluid intake from up to 60 individual flies in the same  
81 trial. Inspired by ARC<sup>27</sup>, the aim here is to develop an apparatus allowing for the analysis  
82 of the ethological (categorical) aspects of motor activity and fluid intake in several  
83 experimental units simultaneously. Then, an apparatus with 14 parallel lanes (lane-maze) was  
84 printed in plastic to accommodate up to 14 individual flies in a single behavioural trial.<sup>28</sup> In  
85 both extremities of each lane, there is a hole to insert a capillary that may be filled with  
86 palatable fluid, which may be used to simulate sucrose preference tests as performed in  
87 rodents.

88 In the field of psychopharmacology, behavioural tests in rodents like forced  
89 swimming, tail suspension, and others are habitually short (5 to 15 minutes).<sup>13,14,15,16,17</sup>  
90 Therefore, here, a short version of a lane-maze test (5 minutes) was tried. To validate the 5-  
91 min lane-maze test, adult, virgin, male and female flies undergone 0, 2, 8 or 20 h of food  
92 deprivation before behavioural testing. An extremity of every lane had a capillary filled with  
93 5% sucrose solution attached, simulating a single-bottle preference test for rodents.<sup>16</sup> Food  
94 deprivation is expected to induce hyperactivity and increased sucrose preference in the flies  
95<sup>20</sup>, which may be accessed by scoring the categorical aspects of behaviour of flies in the lane  
96 or capillary zones. These approaches should allow for high throughput testing to plan well-  
97 powered studies to investigate the behavioural signs of stress in *D. melanogaster*.

## 98 **Materials and Methods**

### 99 **Flies:**

100 *Drosophila melanogaster* (Canton-S) used in this study were obtained from Stock  
101 Center Tucson (Arizona, USA). Both sexes were kept in a vivarium with controlled  
102 temperature and photoperiod ( $20 \pm 1$  °C, 12 h light-dark cycle, lights on at 6 am, 60-80% of  
103 relative humidity) in the Biomedical engineering laboratory at the Federal University of  
104 Santa Catarina. The flies were kept in “house-glasses” (300 mL glass bottles) containing  
105 standard food (supplementary methods) sealed with a foam stopper until hatching.

### 106 **Experimental design and procedures:**

107 On the day of eclosion from the pupa, flies were collected, anaesthetised on ice (-4°C)  
108 for  $\pm 1$  min and separated by sex into different small tubes (7.5 cm x 1.1 cm) where virgin  
109 male or female flies were maintained in groups of 8-10, under identical medium conditions  
110 (1 g/tube) for five days before allocation to the groups (control, C or food deprivation, FD).  
111 Flies were transferred from “house-glasses” to experimental tubes with food (C) or without  
112 food containing a paper filter saturated with water (FD). Experimental tubes were kept under  
113 vivarium conditions until the behavioural tests. For preliminary studies only flies of C groups  
114 were analysed. For experiments, flies of C or FD groups were kept in the experimental tubes  
115 for two (experiment 1), eight (experiment 2) or twenty hours (experiment 3) before  
116 behavioural testing. Each independent experiment was carried out on several experimental  
117 days to complete the final sample size. An experimental day consisted of testing up to twenty  
118 flies, ten males and ten females of C or FD groups simultaneously in the lane-maze.

119 Afterwards, flies were euthanised by immersing the tubes in ice (-4°C, for ±5 min). See  
120 Figure 1B for the timeline.

### 121 **Lane-maze test**

122 Lane-maze <sup>28</sup> (Figure 1 A, supplementary methods) adapted from previously  
123 described methods <sup>22,23, 27</sup>, consisted of a squared arena (external dimensions: 6.6 x 9.2 cm,  
124 internal dimensions: 5 x 5.5 cm) with 14 internal subdivisions (lanes) of identical dimensions  
125 (length: 5 cm, width: 0.3 cm) covered in a transparent acrylic plate. At both extremities of  
126 each lane, a hole (diameter: 0.05 cm) allowed for the insertion of a glass capillary at an angle  
127 of 20 degrees provided by the inclined edges of the external arena. Capillaries allow access  
128 to palatable fluids during behavioural tests carried out in a homemade test environment,  
129 consisting of a plastic bench adapted to support illumination (a string of LED lamps, 490 lux)  
130 and a camera (a USB Digital Microscope Camera, Lenovo ®) placed 42 cm above the lane-  
131 maze, allowing for simultaneous recording of 10 lanes. The lane-maze was maintained in a  
132 fixed position relative to the camera from test to test, on a platform (30 cm length, 4.5 height)  
133 made from white translucent acrylic with a pair of plastic sockets to fit the lane-maze. All  
134 was covered with an opaque screen to avoid illumination variations.

135 Procedures for testing in the lane-maze were as follows: 1- The lane-maze was placed  
136 on an ice-plate for ± 5 min. 2-Flies were anaesthetised on ice (-4°C) for ± 1 min and  
137 transferred carefully, using tweezers, to the respective lane of the cold lane-maze. 3-Each  
138 lane had a glass capillary (diameter: 0.04 cm) filled with blue sucrose solution (5%, dissolved  
139 in filtered water plus 0.1 mL of blue dye, food-grade colouring, Arcolor®, São Paulo-SP,  
140 Brazil) inserted in one of the extremities. Blue dye was added to the sucrose solution to

141 facilitate the capillary visualisation in the video recordings and recognition after behavioural  
142 testing if flies had ingested sucrose. 4-The lane-maze was covered with the acrylic plate  
143 before flies recovered from the anaesthesia and were transferred to the platform of the test;  
144 5-Video camera recording started at insertion of the lane-maze into the test environment. In  
145 the pilot study, behaviours were scored during the whole duration of the test (40 min-  
146 analysis), however, in the experiments 1, 2 and 3 behavioural testing began at five minutes  
147 after each fly moved for the first time in the lane (an indication that anaesthesia was over).  
148 The tests lasted a maximum of 40 min and were performed between 12 am and 4 pm in a  
149 room at  $23 \pm 3$  °C. 6-After the testing, flies were euthanised on ice ( $-4^{\circ}\text{C}$ ,  $\pm 5$  min). 7-After  
150 euthanasia, flies were examined to check for the presence of blue dye in their abdomen. 8-  
151 behavioural registering occurred after finishing the experiments.

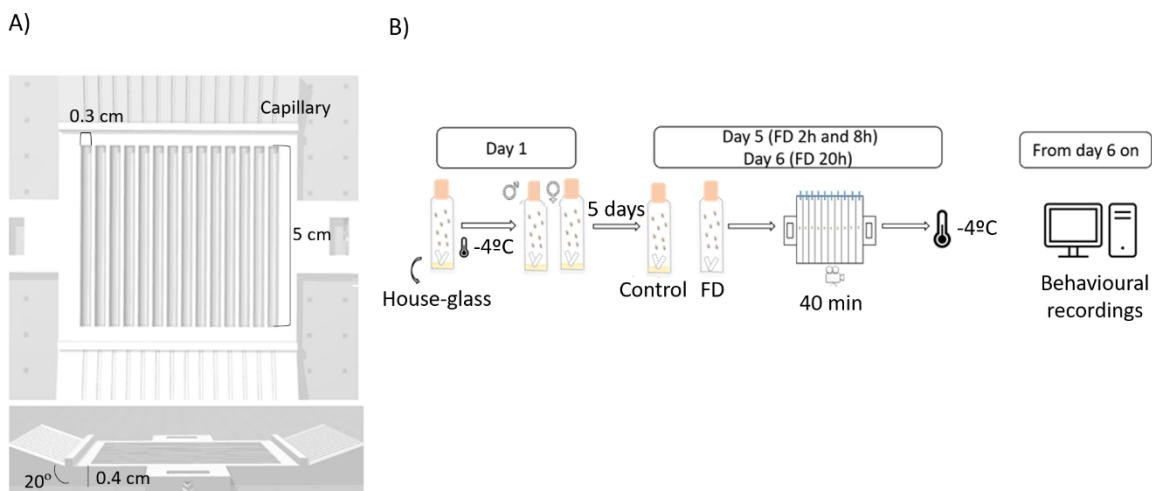

152

153 **Legend for Figure 1:** A- Lane-maze in a top view (upper figure) and a perspective view  
154 (lower figure); B-Experimental design. Abbreviations: FD= food deprivation, C=control.

155



## 156 **Data collection and analysis:**

157 Behavioural outcomes in the lane-maze were defined in the preliminary studies (see  
158 supplementary methods for detailed description). Behavioural registering was performed  
159 using Ethowatcher open-source software package<sup>29</sup> available upon request. Raw data  
160 (duration (s), frequencies, latencies (s)) were analysed directly or used to calculate a  
161 “normalised duration” for every behavioural outcome registered on the lane or capillary  
162 (s/mm, proportion of occupancy) and a “preference index” (deviation from the “expected”  
163 occupancy). Normalisations (duration (s) divided by the area of the capillary or lane (mm))  
164 were necessary to fit the duration of behaviour occurring in the region of the capillary (~5  
165 mm) and lane (~45 mm) on the same scale. Thus, normalised duration of each behaviour  
166 provided a proportional occupancy of the capillary and other regions of the lane. Raw data  
167 and detailed calculations are provided in the supplementary results.

168 Raw behavioural outcomes, "normalised duration" or "preference indexes" were not  
169 normally distributed (significant Kolmogorov-Smirnov test) or presented homogeneous  
170 variances (significant Levene and Brown-Forsythe tests) even after different data  
171 transformations such as box-cox, logarithmic +1, logarithmic10 +1, square-root and square-  
172 root +0.5 (see supplementary results). Therefore, Kruskal–Wallis, a non-parametric one-way  
173 analysis of variance, was used to compare the four groups (F C, F FD, M C, M FD; female=F;  
174 male=M; control=C, food deprived= FD) in the independent experiments (Experiment 1, 2  
175 or 3). *Post hoc* Mann-Whitney was used to assess significant differences between the two  
176 groups. For each independent experiment, the statistical analysis was performed blind for sex  
177 and treatment. Data are expressed as the mean(s)±standard error (SE). Comparisons with a

178 p-value<.05 were considered statistically significant. These analyses were performed using  
179 the software Statistica (Statistica Inc, version 8).

180 “Preference indexes” for every independent experiment (Experiments 1, 2 or 3) were  
181 analysed by comparing expected and observed indexes of preference for the capillary region  
182 of the lane for every experimental group (F C, F FD, M C, M FD; female=F; male=M;  
183 control=C, food deprived= FD) using Sign test and Wilcoxon matched-pairs signed-ranks  
184 test.<sup>30</sup> Data are expressed as the mean (%)  $\pm$  standard error (SE). Comparisons with a p-  
185 value<.05 were considered statistically significant. These analyses were performed using the  
186 software Excel (Microsoft Office, version 16.37).

## 187 **Results**

### 188 **Pilot studies: behavioural outcomes in the lane-maze**

189 Preliminary analyses were performed using data of flies from control groups, see  
190 supplementary material for raw data, means, standard errors and standard deviations.  
191 Behavioural outcomes in the lane-maze were selected according to the quality and reliability  
192 of their assessment, which varied from almost perfect (Cohen's *kappa* upper 80%),  
193 substantial (Cohen's *kappa* upper 75%) to weak (Cohen's *kappa* below 50%) (see  
194 supplementary material for detailed description). Only outcomes considered reliable  
195 (Cohen's *kappa* upper 75%) were included in the quantitative analysis, as follows: immobility  
196 on the lane; locomotion on the lane; grooming on the lane; immobility on the capillary;  
197 locomotion on the capillary; grooming on the capillary. Time of behaviours were arbitrarily  
198 selected for further analysis because their baseline seemed less variable across experiments  
199 than latencies or frequencies.

200 Control flies spent more time in the lane than in the capillary region. Throughout a  
201 40 min-test (Figure 2), the duration of locomotion (left panel), immobility (middle panel) and  
202 grooming (right panel) varied in flies of both sexes (females, upper panel; males, lower  
203 panel). After recovery from anaesthesia, i.e., after 5 min in the lane-maze, flies of both sexes  
204 displayed locomotion and grooming less prevalent than immobility (Figure 2). Considering  
205 that the flies seem to be under anaesthesia during the first 5 min in the lane-maze, the period  
206 before the 5<sup>th</sup> min of the test was discarded from the analyses in the next experiments. After  
207 20 min in the lane-maze, flies were mostly immobile while grooming decreased steadily until  
208 reaching stability at low levels. Locomotion seemed stable over the entire period of the test.  
209 Thus, the time window between the 5<sup>th</sup> and 10<sup>th</sup> minutes of the test was selected for the  
210 analysis in the next experiments.

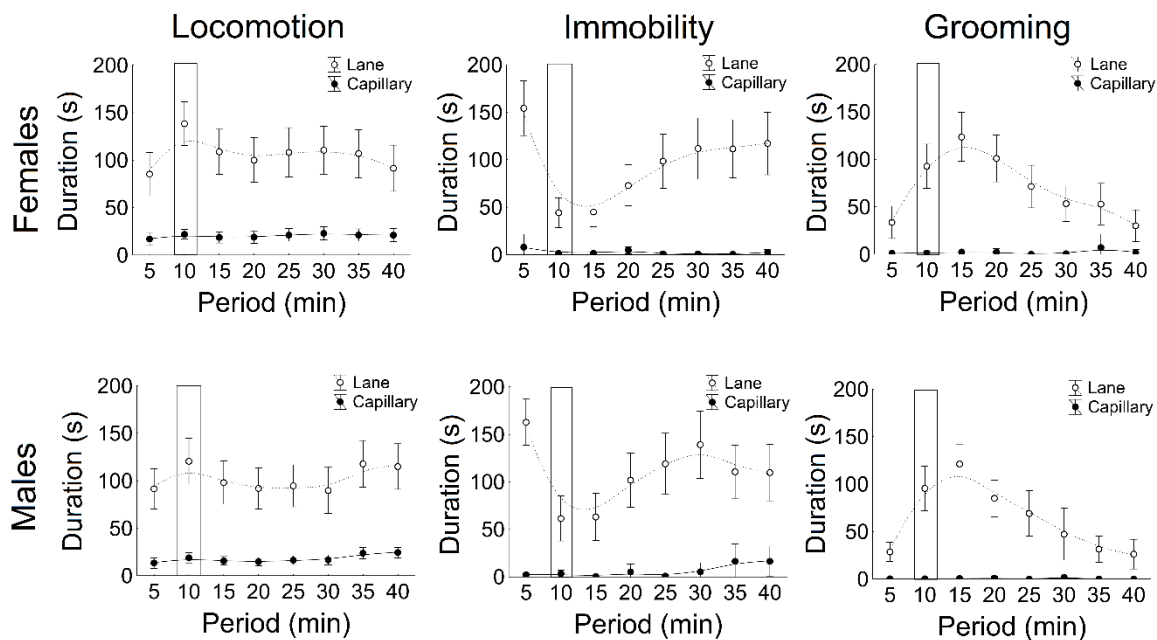

211

212 **Legend for Figure 2:** Duration (s) of locomotion (left panel), immobility (middle panel) and  
213 grooming (right panel) in the lane (white circles) or on the capillary (black circles) of females

214 (upper panels, n=30) or males (lower panels, n=28) flies kept in standard laboratory  
215 conditions before the 40-min lane-maze test. Data are expressed as mean  $\pm$  SEM. Each line  
216 represents a minimum square fit (distance-weighted minimum square fit) for the mean  
217 (Stiffness  $\pm$  25%). The black rectangles depict the period of the behavioural testing selected  
218 for data analysis in the next experiments (5<sup>th</sup>-10<sup>th</sup> min).

### 219 **Effects of food deprivation on behaviour in the lane-maze.**

220 In experiments 1, 2 and 3, lane-maze test lasted 5-min starting after flies recovered  
221 from anaesthesia. For statistical results of non-significant comparisons of the experiments 1,  
222 2 or 3, see supplementary results. In experiment 1 (2 h FD), no significant differences were  
223 observed among the groups (male or female flies of C or 2 h FD, Figure 3, upper panel) when  
224 analysing either raw or normalised duration of locomotion, immobility or grooming in the  
225 lane-maze test. In experiment 2 (8 h FD), except for normalised duration in the lane of  
226 immobility ( $H(3)=7.94$   $p=.04$ ) and grooming ( $H(3)=8.5$ ,  $p=.03$ ), no significant differences  
227 were observed among the groups (male or female flies of C or 8 h FD, Figure 3, middle panel)  
228 when analysing either raw or normalised time of locomotion in the lane or capillary,  
229 immobility or grooming on the capillary. *Post hoc* Mann-Whitney indicate significant  
230 differences ( $p<.05$ ) between the following comparisons: females of the C group had more  
231 grooming in the lane than FD; males of the FD group had more immobility in the lane than  
232 C. In experiment 3 (20 h FD), no significant differences were observed among the groups  
233 (male or female flies of C or 20 h FD, Figure 3, lower panel) when analysing either raw or  
234 normalised locomotion durations immobility or grooming in the lane-maze test.

235

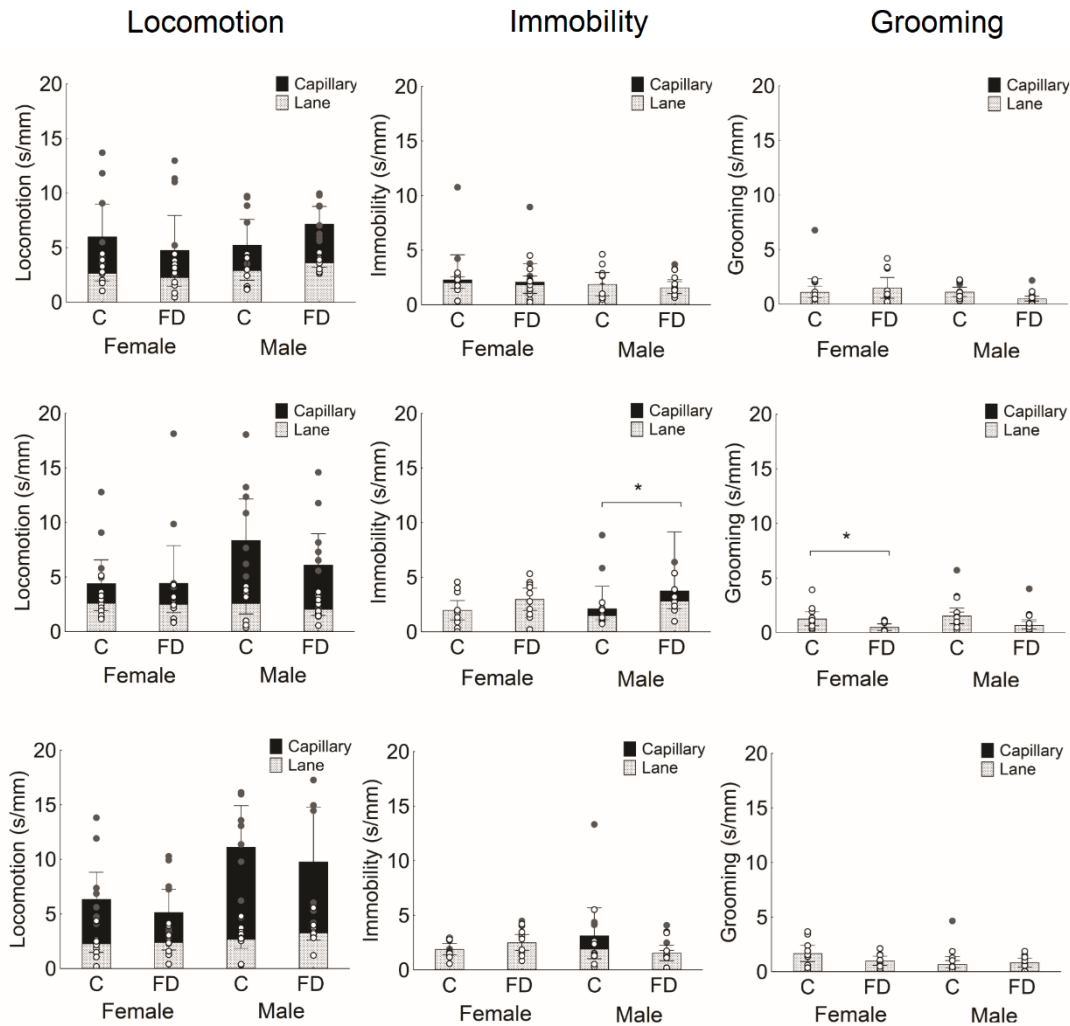

236

237 **Legend for Figure 3:** Proportion (seconds *per* millimetres, s/mm) of locomotion (left  
 238 panels), immobility (middle panels), grooming (right panels) of female or male flies of the  
 239 control (C) or food-deprived (FD) groups on the capillary (black bars) or lane (grey bars)  
 240 during 5-min of the lane-maze test. Upper panel depicts result experiment 1 (C, females, n=9;  
 241 males, n=9; 2 h FD, females, n=10; males, n=9); middle panel depicts result experiment 2  
 242 (C, females, n=11; males, n=9; 8 h FD, females, n=10; males, n=10); lower panel depicts  
 243 result experiment 3 (C, females, n=10; males, n=10; 20 h FD, females, n=10; males, n=10).

244 Data are expressed as mean  $\pm$ SEM. Grey circles= individual data for the capillary, white  
245 circles= individual data for the lane. (\*) significant according to the Mann-Whitney test,  
246  $p < .05$ .

#### 247 **Effects of food deprivation on capillary preference in the lane-maze test:**

248 Occupancy of the capillary region, i.e., “preference index”, varied from group to  
249 group depending on the sex of the flies and experimental conditions (Figure 4, table S6). In  
250 the C groups, the preference index of female flies was not significantly higher than expected  
251 in any experiment (Sign test,  $p > .05$ ; Wilcoxon test,  $p > .05$ ), while for males, it varied from  
252 experiment to experiment. In experiments 1 and 3, the preference index of male flies of C  
253 group was not significantly higher than expected (Sign test,  $p > .05$ ; Wilcoxon test,  $p > .05$ ).  
254 Although in experiment 2, the preference index of male flies of C group was significantly  
255 high (Sign test,  $p < .05$ ; Wilcoxon test,  $p < .05$ ). In FD groups, female flies had a significantly  
256 higher preference for the capillary region of the lane than expected when fasting lasted for  
257 20 h (Experiment 3; Sign test,  $p > .05$ ; Wilcoxon test,  $p < .05$ ) but not for 2 or 8 h (Experiments  
258 1 and 2; Sign test,  $p > .05$ ; Wilcoxon test,  $p > .05$ ). By contrast, male flies undergoing FD for 2  
259 h (Experiment 1) had a significantly higher preference for the capillary region than expected  
260 (Sign test,  $p > .05$ ; Wilcoxon test,  $p > .05$ ). Longer times of FD (8 h or 20 h) increased  
261 preference for the capillary region, but not significantly (Sign test,  $p > .05$ ; Wilcoxon test,  
262  $p > .05$ ).

263

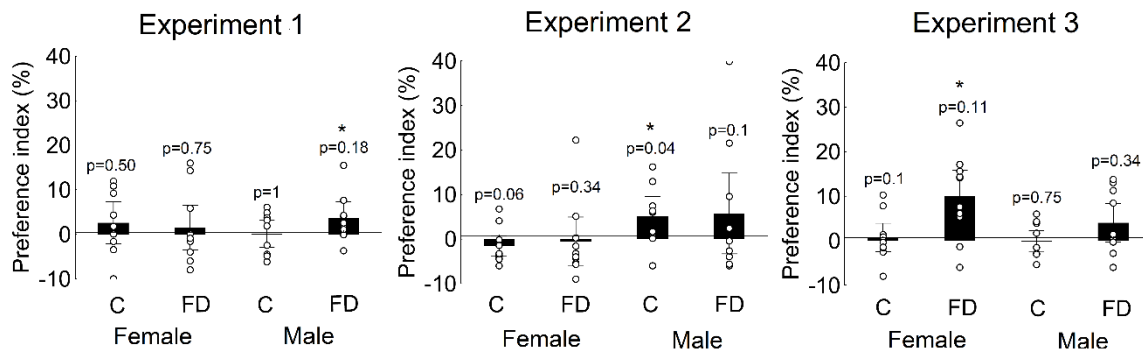

264

265 **Legend for Figure 4:** Preference for the capillary region of the lane (“preference index” %)  
266 of flies of control (C) or food-deprived (FD) groups in the experiment 1 (left panel; C,  
267 females, n=9; males, n=9; 2 h FD, females, n= 10; males, n=9), experiment 2 (middle panel,  
268 C, females, n=11; males, n=9; 8 h FD, females, n= 10; males, n=10) and experiment 3 (right  
269 panel, C, females, n=10; males, n=10; 20 h FD, females, n=10; males, n=10). Data are  
270 expressed as mean ± SEM. White circles= individual data, *p values* are of the Sign test, (\*)  
271 significant according to Wilcoxon test,  $p < .05$ .

## 272 Discussion

273 In this study, a lane-maze test was designed and standardised to simultaneously  
274 evaluate behaviours related to general motor activity and fluid intake in several individual  
275 flies. In flies, motor activity<sup>20, 31, 32, 33, 34</sup> and fluid intake<sup>21, 22, 23, 24, 25, 26</sup> are often measured  
276 independently in separate apparatuses, except ARC.<sup>27</sup> Motor activities are often measured  
277 using automatic tracking in the open field tests,<sup>20, 31, 32, 33, 34</sup> while sucrose preference may be  
278 assessed in various analyses of fluid intake (e.g., CAFE<sup>22,23</sup>; proboscis extension<sup>24</sup>; ARC  
279<sup>27</sup>). Using positional tracking of individual flies and microcapillaries, ARC<sup>27</sup> provides a high  
280 throughput platform for the simultaneous assessment of activity, immobility, and fluid intake.

281 Similar to ARC,<sup>27</sup> the lane-maze enabled the concurrent testing of multiple experimental  
282 units allowing for larger sample sizes, facilitating the design of well-powered studies. Indeed,  
283 the lane-maze enabled the evaluation of categorical aspects of activity like locomotion,  
284 immobility, grooming or fluid intake in flies in the same trial. Besides, lane-maze allocates  
285 a capillary in both sides of the lane. This is an advantage of this apparatus because allows the  
286 assessment of a binary preference measures, such as preference for different tastes or odors,  
287 in multiple experimental units simultaneously. Therefore, this apparatus could accelerate the  
288 acquisition of data in preference tests. The paired assessment of different outcomes in a  
289 single trial may reduce the time required for a behavioural experiment matched with  
290 individual genetic, proteomic, or biochemical profiles of individual animals.

291 Assessment of locomotion or immobility of flies was feasible and reliable in the  
292 different sectors of the lane. In contrast, more complex behaviour, such as grooming, required  
293 more standardisation of the illumination and video recordings to provide reliable results.  
294 Besides, the assessment of sucrose preference by measuring sucrose intake was particularly  
295 challenging. Sucrose solution contained blue dye to enable the visual inspection of the  
296 capillary in the video recordings - which was indistinguishable from the background when  
297 filled with a clear solution - and estimate the intake of sucrose by examining the abdomen of  
298 flies after behavioural testing.<sup>25</sup> Although the blue dye made the capillary visible in the video  
299 recordings, it was useless to measure sucrose intake in most of the flies examined. In flies,  
300 the average consumption of fluids in 24 h may be in a range of 1 microliter (CAFE),<sup>22,23</sup>  
301 precluding reliable measurements of sucrose volume during the 5-min lane-maze test. Hence,  
302 the amount of sucrose intake by flies during the lane-maze test was uncertain in the present



303 experiments. Therefore, sucrose preference was appraised by calculating an index of  
304 preference based on the time spent by flies on the capillary.

305 An index of preference was calculated considering the time of all activities that flies  
306 performed on the capillary, including locomotion, immobility, and grooming. The preference  
307 index could then be calculated using tracking data as obtained in ARC.<sup>27</sup> Raw measures of  
308 duration delivered much larger values of time in the lane than in the capillary because the  
309 capillary is smaller than the remainder of the lane, impeding a fair appraisal of the occupancy  
310 in different lane regions. Since the capillary occupies roughly 10% of a lane, it was expected  
311 that flies would spend around 10% of the time on the capillary and 90% in the remaining  
312 lane. Thus, the normalisation of the time spent by a fly in a lane sector by the length of the  
313 same sector (lane or capillary) is a more unbiased indicator of proportional exploration than  
314 raw time measurement. When normalised values were analysed, locomotion on the capillary  
315 was proportionally more frequent than on the remainder of the lane, while immobility and  
316 grooming were less prevalent and more equally distributed over the entire lane.

317 The difference between the expected and observed occupancy of the arena provided  
318 a measure for an individual or a group of flies *per se* without depending on an external  
319 reference, such as a control group. Positive, null, or negative values of the preference index  
320 may be interpreted as: preference, indifference (neutral), or avoidance of the capillary. Flies  
321 of all experimental groups spent proportionally more time near the capillary than in the other  
322 regions of the lane, indicating an attractive quality in the capillary region. Like in rodents<sup>14,</sup>  
323<sup>35, 36, 37, 38, 39, 40</sup>, a combination of the different opportunities offered by the capillary region  
324 such as shelter, novelty and sucrose may contribute to the proportionally higher exploration

325 of the capillary by flies in all groups. Future studies, e.g., “two-bottles” sucrose preference  
326 test,<sup>16</sup> should be performed to separate the preference for sucrose from other attractive  
327 features of the capillary.

328 According to previous literature, food deprivation may induce hyperactivity,  
329 *centrophilic* behaviour and sucrose preference in flies.<sup>20,21</sup> In the present study, except for the  
330 small effect of food-deprivation for 8 h on the normalised times of grooming of females or  
331 immobility of males in the lane, no other obvious effect of food deprivation was observed.  
332 Indeed, food deprivation for 2, 8 or 20 h failed to promote hyperactivity compared to the  
333 control flies, maybe because locomotion is already a high incident behaviour in the lane-  
334 maze. Alternatively, the short duration of the test may explain the small effect sizes of food-  
335 deprivation on the motor activity of flies. The preference index revealed that the preference  
336 of flies for the capillary changed according to sex or experimental condition. The capillary  
337 preference seems neutral for male flies in most situations, except for the significantly high  
338 preference under control conditions (experiment 2) or food deprivation for two hours  
339 (experiment 1). In contrast, capillary preference seems neutral for female flies in most  
340 groups, except for the significantly high index in females deprived for 20 h.

341 In conclusion, data indicate that independent of sex or fasting conditions, flies  
342 explored more the capillary rather than the remainder of the lane. Food deprivation increased  
343 capillary preference in a sex or cohort-dependent fashion, which in females was more  
344 consistent than in males. Moreover, the duration of food deprivation in flies seems a  
345 determinant aspect modulating the preference for the capillary region of the lane. Data  
346 suggest that short lane-maze test is a feasibly high throughput assessment of sucrose

347 preference in *D. melanogaster*, which may be sexually dimorphic as in other species studied  
348 so far.

349 Further studies are needed to confirm present findings overcoming limitations of the  
350 current study: 1- lack of power analysis, 2-short period of behavioural test, 3-use of  
351 anaesthesia to transfer flies to the lane-maze, 4-an indirect measure of the interaction of the  
352 fly with sucrose solution. Therefore, future studies should use power analysis to calculate  
353 sample sizes to detect the effects of food deprivation, or other intervention, on the preference  
354 index calculated from data scored in the lane-maze test. These future experiments should  
355 consider longer periods of the lane-maze test. To avoid the influence of the anaesthesia, flies  
356 may be transferred from the experimental tubes to lane-maze using a mouth aspirator as in  
357 other studies.<sup>31</sup> A practical solution to detect the interaction of the flies with the liquid sucrose  
358 would be to adapt a sensor for proboscis's extension in the capillary.<sup>21</sup>

### 359 **Acknowledgements:**

360 The authors thank Fabiani F Triches for the support in the maintenance of the  
361 vivarium, Tamires M Marchetto for the blinding of the video recordings of behavioural  
362 testing and João A Marcolan for the assistance with the Ethowatcher software. This  
363 manuscript was edited for English language by Ann C. Ferry.

### 364 **Declaration of conflicting interests**

365 The authors declare that there is no conflict of interest.

### 366 **Funding**

367 Fabiola B Eckert received fellowship from Conselho Nacional de Desenvolvimento  
368 Científico e Tecnológico, Brazil (140007/2016-4). This study was financed in part by the

369 Coordenação de Aperfeiçoamento de Pessoal de Nível Superior – Brasil (CAPES) – Finance

370 Code 001".

371

372 **References**

- 373 1. Robinson NB, Krieger K, Khan F et al. The current state of animal models in research: A  
374 review. *Int J Surg* 2019; 72: 9-13.
- 375 2. National Centre for the Replacement Refinement and Reduction of Animals in Research.  
376 The 3Rs, <https://www.nc3rs.org.uk/the-3rs>, (accessed in February 2021).
- 377 3. Bellen HJ, Tong C and Tsuda H. 100 years of *Drosophila* research and its impact on  
378 vertebrate neuroscience: a history lesson for the future. *Nat Rev Neurosci* 2010; 11: 514–522.
- 379 4. Jennings BH. *Drosophila*—a versatile model in biology & medicine. *Mater today*, 2011;  
380 14: 190-195.
- 381 5. Ries AS, Hermanns T, Poeck B, et al. Serotonin modulates a depression-like state in  
382 *Drosophila* responsive to lithium treatment. *Nat Commun* 2017; 8: 15738.
- 383 6. Moulin, TC, Covill, LE, Itskov, PM, et al. Rodent and fly models in behavioral  
384 neuroscience: An evaluation of methodological advances, comparative research, and future  
385 perspectives. *Neurosci Biobehav Rev* 2021; 120:1-12
- 386 7. Hidalgo S, Molina-Mateo D, Escobedo P, et al. Characterisation of a novel *Drosophila*  
387 SERT mutant: insights on the contribution of the serotonin neural system to behaviors. *ACS*  
388 *Chem Neurosci* 2017; 8: 2168–217
- 389 8. Kasture A, Hummel T, Sucic S, et al. Big lessons from tiny flies: *Drosophila melanogaster*  
390 as a model to explore dysfunction of dopaminergic and serotonergic neurotransmitter  
391 systems. *Int J Mol Sci* 2018; 19: 1788
- 392 9. Mohammad F, Aryal S, Ho J, et al. Ancient anxiety pathways influence *Drosophila*  
393 defense behaviors. *Curr Biol* 2016; 26:981-986.

- 394 10. Harris KP and Littleton JT. Transmission, development, and plasticity of synapses.  
395 *Genetics* 2015; 201: 345-375.
- 396 11. Sherman, AD, Sacquitne, JL and Petty, F. Specificity of the learned helplessness model  
397 of depression. *Pharmacol Biochem Behav* 1982; 16: 449-454.
- 398 12. Vollmayr B and Gass P. Learned helplessness: unique features and translational value of  
399 a cognitive depression model. *Cell and tissue research*, 2013; 354: 171-178.
- 400 13. Domingues K, Lima FB, Linder AE, et al. Sexually dimorphic responses of rats to  
401 fluoxetine in the forced swimming test are unrelated to the function of the serotonin  
402 transporter in the brain. *Synapse* 2019; 74: e22130.
- 403 14. Remus JL, Stewart LT, Camp RM, et al. interaction of metabolic stress with chronic mild  
404 stress in altering brain cytokines and sucrose preference. *Behav neurosci* 2015; 129: 321.
- 405 15. Wang Z, Gu J, Wang X, et al. Antidepressant-like activity of resveratrol treatment in the  
406 forced swim test and tail suspension test in mice: the HPA axis, BDNF expression and  
407 phosphorylation of ERK. *Pharmacol Biochem Behav* 2013; 112:104-110.
- 408 16. Towell A, Muscat R, Willner P. Effects of pimozide on sucrose consumption and  
409 preference. *Psychopharmacol* 1987; 92: 262-264.
- 410 17. Robinson NB, Krieger K, Khan F et al. The current state of animal models in research:  
411 A review. *Int J Surg* 2019; 72: 9-13.
- 412 18. Brown GE, Mitchell AL, Percy AM, et al. Learned helplessness in *Drosophila*  
413 *melanogaster*? *Psychol Rep* 1996; 78: 962–962.

- 414 19. Araujo SM, Poetini MR, Bortolotto VC, et al. Chronic unpredictable mild stress-induced  
415 depressive-like behavior and dysregulation of brain levels of biogenic amines in *Drosophila*  
416 *melanogaster*. *Behav Brain Res* 2018; 351: 104–113.
- 417 20. Ramos-Hryb AB, Ramirez MF, Lino-de-Oliveira C, et al. Stress-mediated hyperactivity  
418 and anhedonia resistant to diazepam and fluoxetine in *Drosophila*. *Stress*. 2021; 24: 96-106.
- 419 21. Itskov PM, Moreira JM, Vinnik E, et al. Automated monitoring and quantitative analysis  
420 of feeding behaviour in *Drosophila*. *Nat Commun* 2014; 5:1-10.
- 421 22. Ja WW, Carvalho GB, Mak EM, et al. Prandiology of *Drosophila* and the CAFE assay.  
422 *Proc Natl Acad Sci USA* 2007; 104: 8253–8256.
- 423 23. Diegelmann S, Jansen A, Jois S, et al. The CApillary FEeder assay measures food intake  
424 in *Drosophila melanogaster*. *J Vis Exp* 2017; 121: 55024.
- 425 24. Gordesky-Gold B, Rivers N, Ahmed OM, et al. *Drosophila melanogaster* prefers  
426 compounds perceived sweet by humans. *Chemical senses* 2008; 33: 301-309.
- 427 25. Deshpande SA, Carvalho GB, Amador A, et al. Quantifying *Drosophila* food intake:  
428 comparative analysis of current methodology. *Nat methods* 2014; 11: 535.
- 429 26. Ro J, Harvanek ZM and Pletcher SD. FLIC: high-throughput, continuous analysis of  
430 feeding behaviors in *Drosophila*. *PloS one* 2014; 9: 101107.
- 431 27. Murphy, KR, Park, JH, Huber, R, et al. Simultaneous measurement of sleep and feeding  
432 in individual *Drosophila*. *Nat Protoc* 2017; 12: 2355.
- 433 28. Eckert, FB, Valdati, DB, de Toni, DC, et al. Lane-maze for behavioral tests in flies.  
434 *Drosophila Information Service*, 2020; 103: 77-80.

- 435 29. Marcolan JA. *Ferramenta de código aberto para análise de comportamento e aquisição*  
436 *de vídeo em "tempo real" usando técnicas de visão computacional e processamento paralelo.*  
437 Master Dissertation, Federal University of Santa Catarina, Brazil, 2017.
- 438 30. Lehner, P N. *Handbook of ethological methods*. 2nd ed. Cambridge: Cambridge  
439 University Press, 1998, p. 672.
- 440 31. Krashes MJ and Waddell S. Rapid consolidation to a radish and protein synthesis-  
441 dependent long-term memory after single-session appetitive olfactory conditioning in  
442 *Drosophila*. *J Neurosci* 2008; 28: 3103-3113.
- 443 32. Martin JR. A portrait of locomotor behaviour in *Drosophila* determined by a video-  
444 tracking paradigm. *Behav processes* 2004; 67: 207-219.
- 445 33. Valente D, Golani I and Mitra PP. Analysis of the trajectory of *Drosophila melanogaster*  
446 in a circular open field arena. *PloS one* 2007; 2: e1083.
- 447 34. Pfeiffenberger, C, Lear, BC, Keegan, KP et al. Locomotor activity level monitoring using  
448 the *Drosophila* Activity Monitoring (DAM) System. *Cold Spring Harbor Protoc*, 2010; 11:  
449 5518.
- 450 35. Liu MY, Yin CY, Zhu LJ, et al. Sucrose preference test for measurement of stress-  
451 induced anhedonia in mice. *Nat Protoc* 2018; 13: 1686-1698.
- 452 36. Torregrossa AM, Bales MB, Breza JM, et al. Water restriction and fluid temperature alter  
453 preference for water and sucrose solutions. *Chem Senses* 2012; 37: 279-292.
- 454 37. Lian B, Gao J, Sui N, et al. Object, spatial and social recognition testing in a single test  
455 paradigm. *Neurobiol Learn Mem* 2018; 152: 39-49.



- 456 38. Grahn RE, Kalman BA, Vlasaty JA, et al. Effects of plus-maze experience and  
457 chlordiazepoxide on anxiety-like behavior and serotonin neural activity in the dorsal raphe  
458 nucleus in rats. *Behav Pharmacol* 2019; 30: 208-219.
- 459 39. Mathiasen JR and DiCamillo A. Novel object recognition in the rat: a facile assay for  
460 cognitive function. *Curr Protoc Pharmacol* 2010; 49: 5-59
- 461 40. Walf AA and Frye CA. The use of the elevated plus maze as an assay of anxiety-related  
462 behavior in rodents. *Nat Protoc* 2007; 2: 322-328.
